# Supplementary material for: Activation of Glucocorticoid Receptor Inhibits the Stem-Like Properties of Bladder Cancer via Inactivating the β-Catenin Pathway
Source: Front Oncol. 2020 Aug 5;10:1332. doi: 10.3389/fonc.2020.01332 (PMC7419687; doi:10.3389/fonc.2020.01332)
Supplement: Supplementary file 4 [file Table_4.XLSX]

## Sheet: TCC-SUP
GENE	MOCK(control)			DEX(control)			RU486(control)			DEX+RU486(control)			MOCK(knockdown)			DEX(knockdown)			MOCK(knockout)			DEX(knockout)
	ΔCт Mean	SD	N	ΔCт Mean	SD	N	ΔCт Mean	SD	N	ΔCт Mean	SD	N	ΔCт Mean	SD	N	ΔCт Mean	SD	N	ΔCт Mean	SD	N	ΔCт Mean	SD	N
CD44	-0.00671	0.004124	5	2.00357	0.023	5	-0.0104934	0.0752	5	0.292122	0.04246	5	-0.27858	0.083554	5	-0.288181	0.02681	5	-0.517225	0.063125	5	-0.555031	0.083452	5
GR	1.13759	0.001	5	2.11034	0.0321	5	1.13852	0.0132	5	1.60398	0.02832	5	3.07665	0.0411	5	3.1912	0.02321	5	2.87488	0.006123	5	2.89772	0.0312	5
C-MYC	5.2531	0.004125	5	7.56561	0.09361	5	5.21931	0.06295	5	5.74579	0.0263	5	4.23904	0.0824	5	4.29564	0.058591	5	4.04297	0.1035	5	4.11979	0.0951	5
Beta-catenine	3.20261	0.0132487	5	4.38867	0.058165	5	3.07815	0.06823	5	3.92139	0.095467	5	2.77962	0.10365	5	2.76901	0.0358673	5	2.44384	0.10732	5	2.47181	0.13578	5
Snail	7.66439	0.0214	5	8.97991	0.148924	5	7.70787	0.0757829	5	7.94438	0.10628	5	7.3771	0.09254	5	7.3621	0.06435	5	7.22119	0.125373	5	7.18267	0.0921	5
OCT-4	-1.35428	0.0114	5	0.374146	0.18924	5	-1.24496	0.157829	5	-0.881555	0.07628	5	-1.64158	0.09254	5	-1.62176	0.0558	5	-1.77652	0.105	5	-1.76038	0.0921	5
